# Supplementary material for: New reagents for selective extraction of Pd(ii) and Au(iii) from acidic media
Source: Royal Society of Chemistry journal article supplement (doi:10.1039/d3nj02061d), 2023-01-01

## Supporting Information

---

### New reagents for selective extraction of Pd(II) and Au(III) from acidic media

Darya V. Zubricheva, a Sergey N. Bizyaev, a Vera D. Tikhova a and Alexey V. Tkachev \*a

<sup>a</sup> *N. N. Vorozhtsov Novosibirsk Institute of Organic Chemistry, Siberian Branch of Russian Academy of Sciences, 9 Academician Lavrentiev Ave., 630090 Novosibirsk, Russian Federation. E-mail: atkachev@nioch.nsc.ru*

### Table of Contents

#### NMR spectra of the new compounds synthesized

|                                                                                                                                                                                                                                                                                                                          |   |
|--------------------------------------------------------------------------------------------------------------------------------------------------------------------------------------------------------------------------------------------------------------------------------------------------------------------------|---|
| (3 <i>E</i> ,3' <i>E</i> )-2-((4-(4-((( <i>E</i> )-3-(hydroxyimino)-2-methylpentan-2-yl)amino)benzyl)phenyl)amino)-2-methylpentan-3-one oxime ( <b>5</b> ).....                                                                                                                                                          | 2 |
| (1 <i>R</i> ,1' <i>R</i> ,2 <i>R</i> ,2' <i>R</i> ,3 <i>E</i> ,3' <i>E</i> ,5 <i>R</i> ,5' <i>R</i> )-2-((4-(4-(((1 <i>R</i> ,2 <i>R</i> ,5 <i>R</i> , <i>E</i> )-3-(hydroxyimino)-2,6,6-trimethylbicyclo[3.1.1]heptan-2-yl)amino)benzyl)phenyl)amino)-2,6,6-trimethylbicyclo[3.1.1]heptan-3-one oxime ( <b>7</b> )..... | 3 |

(3*E*,3'*E*)-2-((4-(4-(((*E*)-3-(hydroxyimino)-2-methylpentan-2-yl)amino)benzyl)phenyl)amino)-2-methylpentan-3-one oxime (**5**)

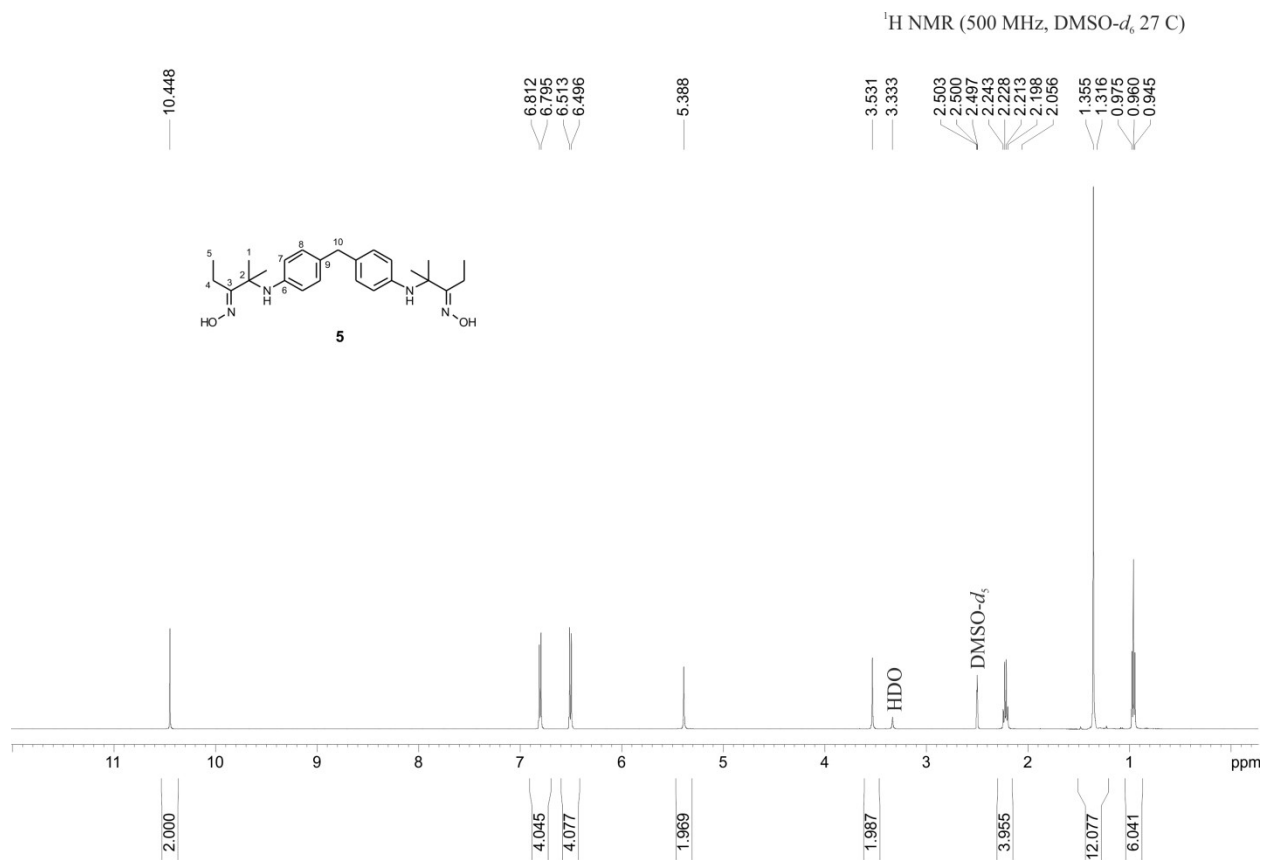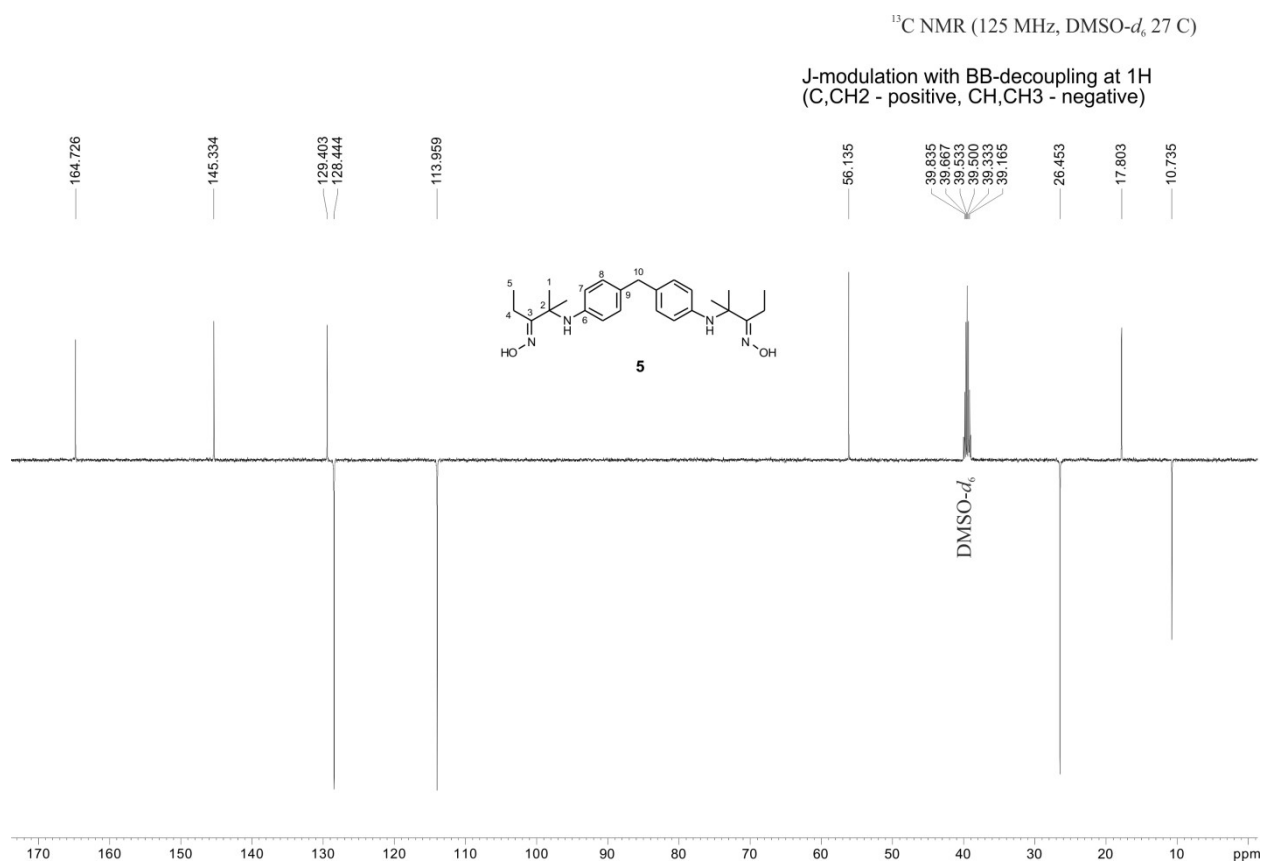

(1*R*,1'*R*,2*R*,2'*R*,3*E*,3'*E*,5*R*,5'*R*)-2-((4-(4-(((1*R*,2*R*,5*R*,*E*)-3-(hydroxyimino)-2,6,6-trimethylbicyclo[3.1.1]heptan-2-yl)amino)benzyl)phenyl)amino)-2,6,6-trimethylbicyclo[3.1.1]heptan-3-one oxime (**7**)

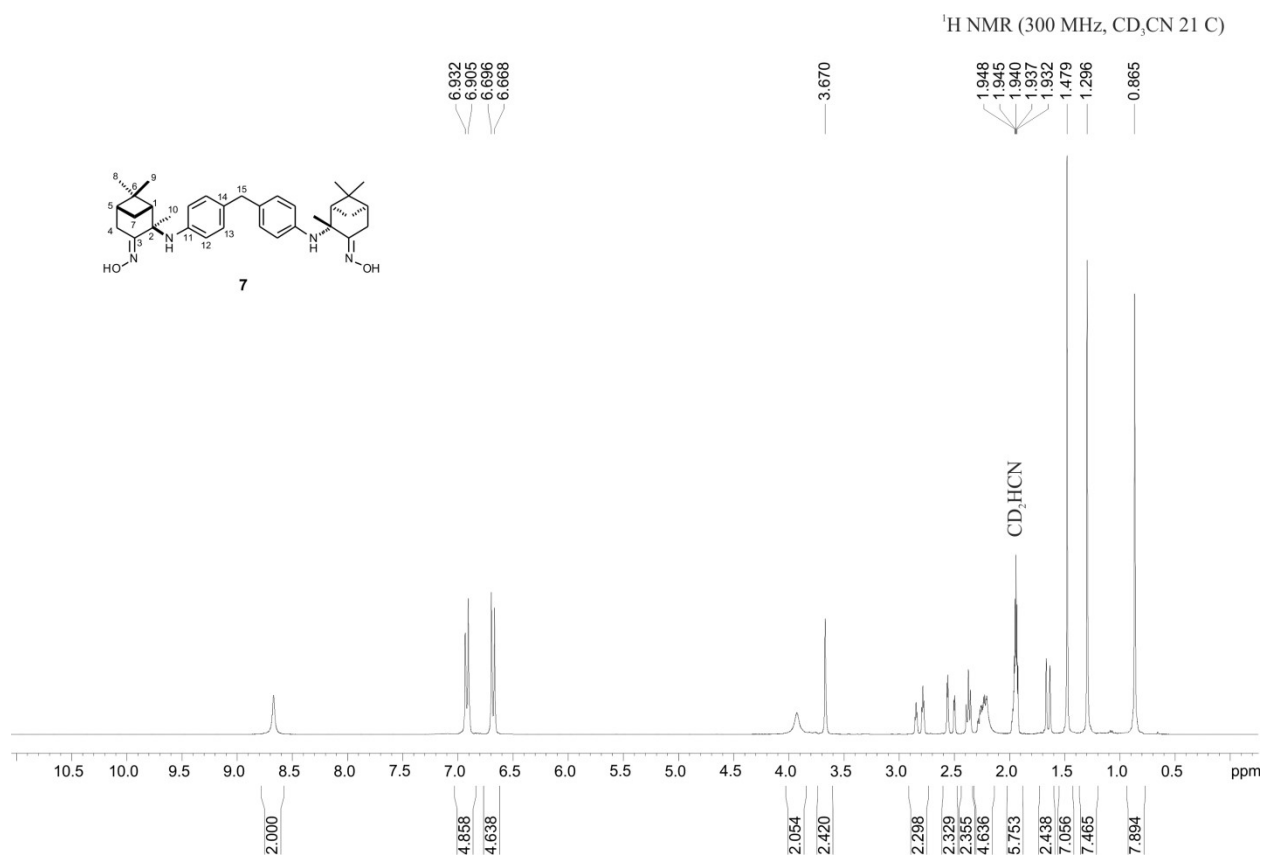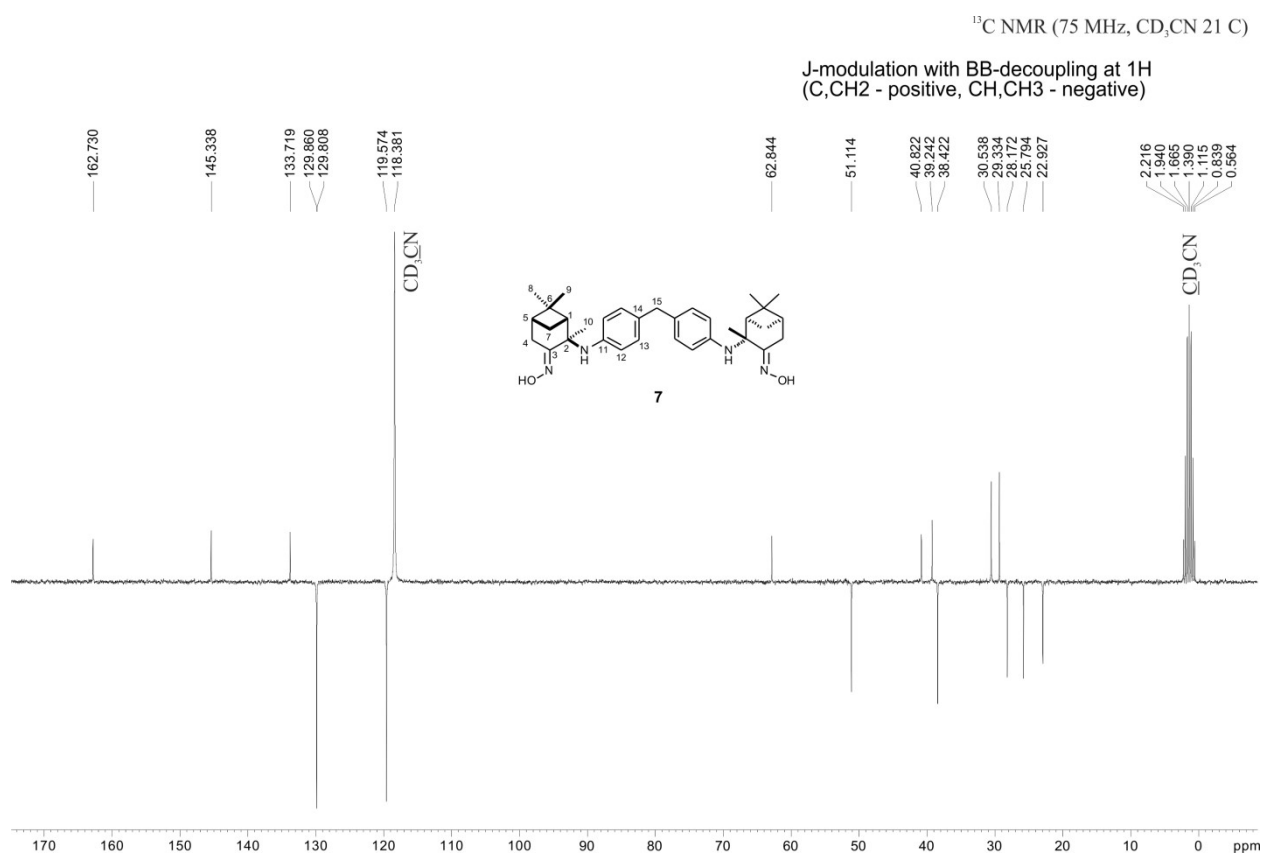

Supplement: d3nj02061d1.pdf [file d3nj02061d1.pdf]
